# Supplementary material for: Selective and colorimetric fluoride anion chemosensor based on s-tetrazines
Source: Royal Society of Chemistry journal article supplement (doi:10.1039/c2dt31641b), 2012-01-01

# Supporting Information

## Selective and Colorimetric Chemosensors for Fluoride Anion Based on *s*-Tetrazines

*Yingjie Zhao,<sup>a</sup> Yongjun Li,\*<sup>a</sup> Zhihong Qin,<sup>a,b</sup> Runsheng Jiang,<sup>a,b</sup> Huibiao Liu,<sup>a</sup> Yuliang Li<sup>a</sup>*

<sup>a</sup> Beijing National Laboratory for Molecular Sciences (BNLMS), CAS Key Laboratory of Organic Solids, Institute of Chemistry, Chinese Academy of Sciences, Beijing 100190, P.R. China.

<sup>b</sup> Graduate University of Chinese Academy of Sciences, Beijing 100190, P.R. China

## $^1\text{H}$ NMR and $^{13}\text{C}$ NMR

$^1\text{H}$  NMR spectrum (600 MHz, 298 K,  $\text{DMSO-}d_6$ ) of **2**

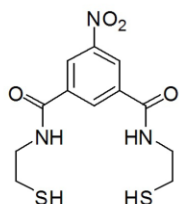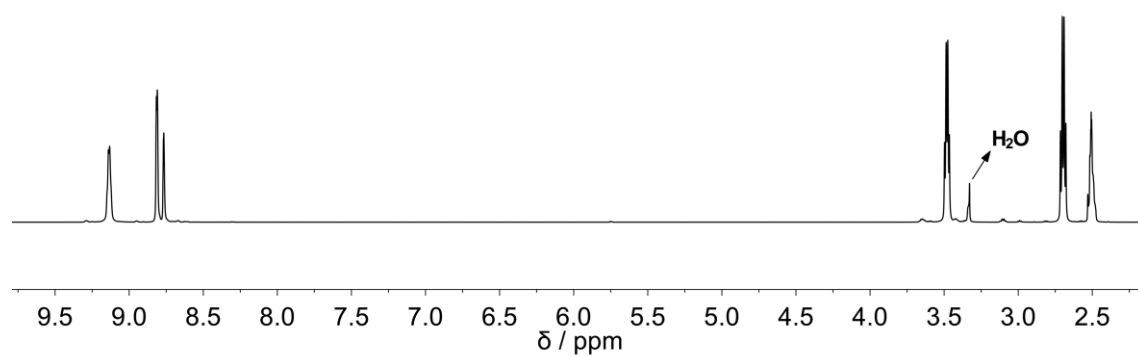

$^{13}\text{C}$  NMR spectrum (150 MHz, 298 K,  $\text{DMSO-}d_6$ ) of **2**

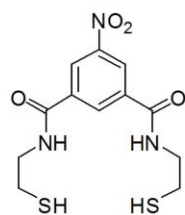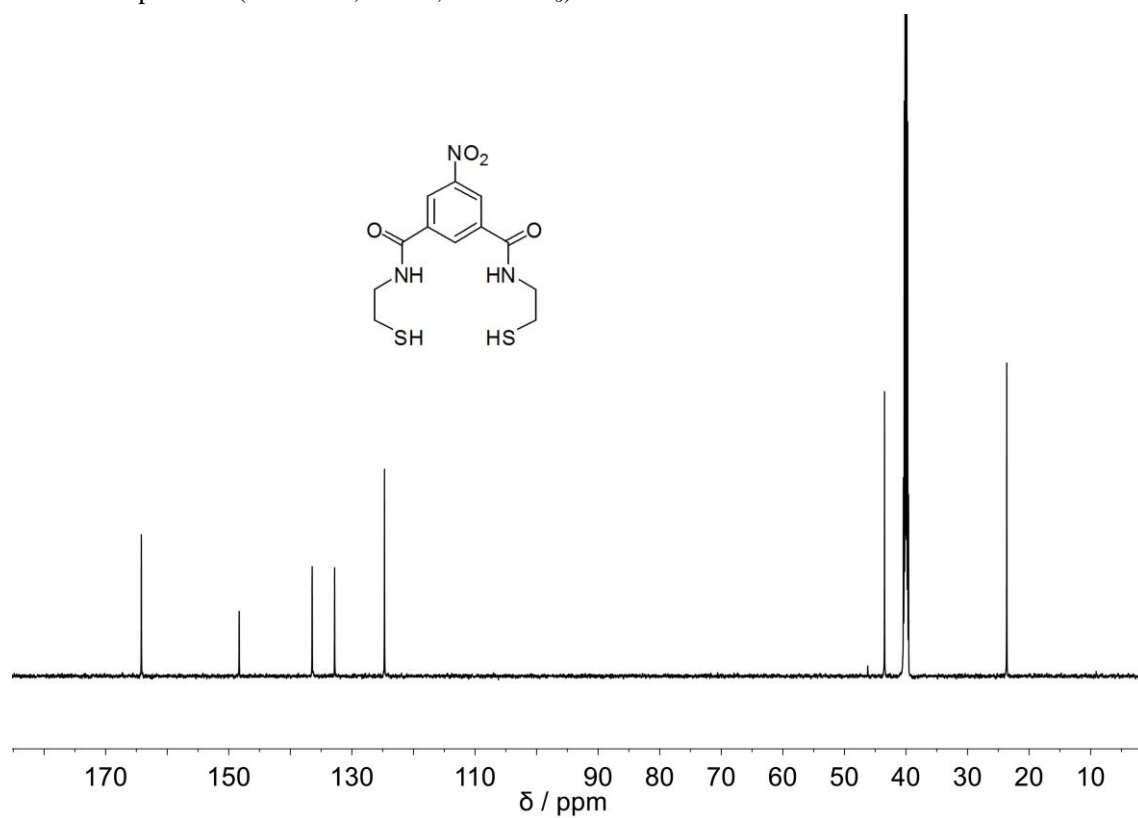

$^1\text{H}$  NMR spectrum (400 MHz, 298 K,  $\text{DMSO-}d_6$ ) of **3**

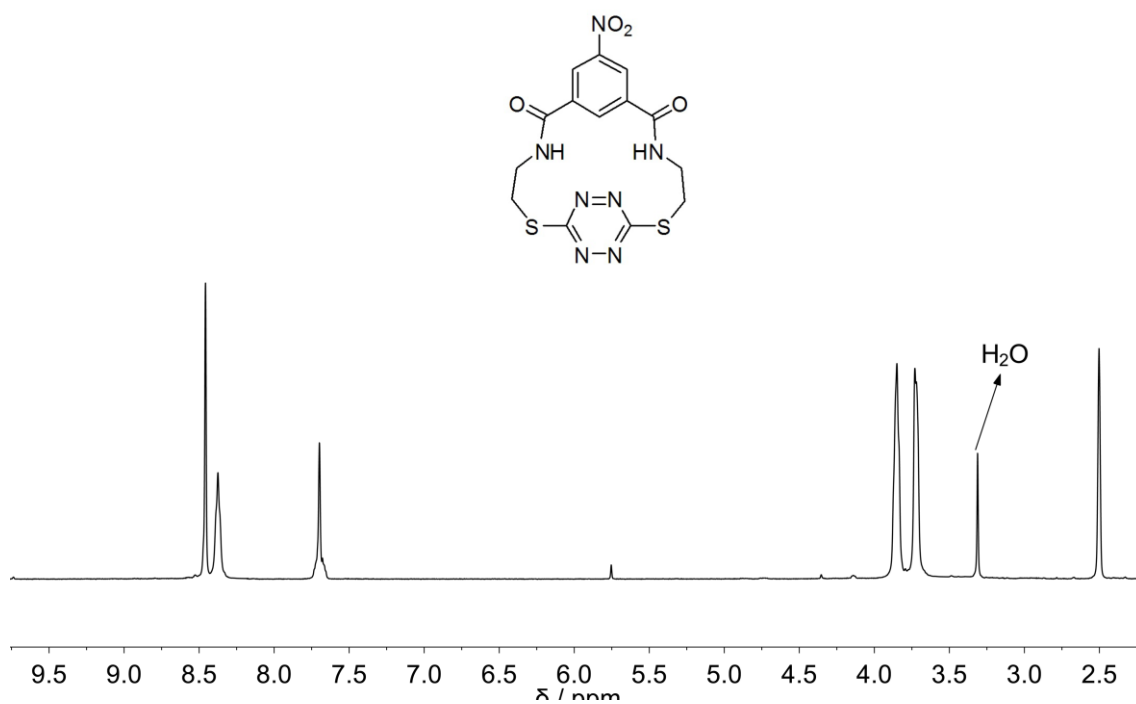

$^{13}\text{C}$  NMR spectrum (150 MHz, 298 K,  $\text{DMSO-}d_6$ ) of **3**

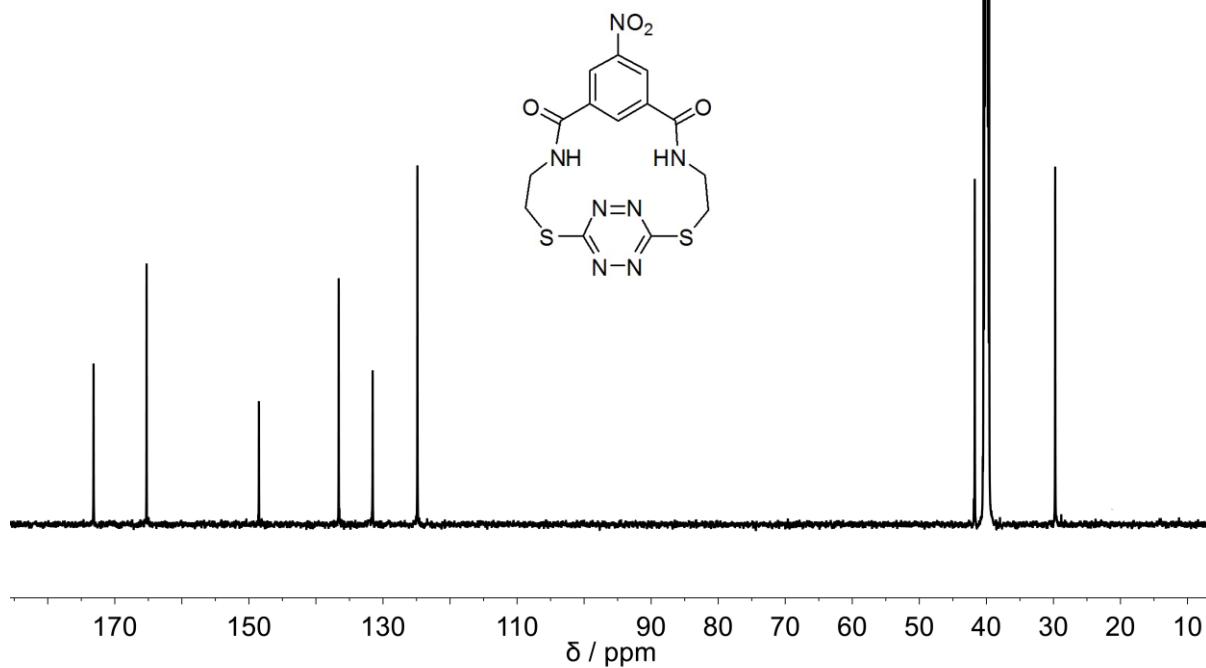

Supplement: c2dt31641b.pdf [file c2dt31641b.pdf]
